# Supplementary material
Source: publisher site journal article supplement (http://www.kjim.org/upload/media/kjim-2019-016-suppl7.pdf)
Supplement: Supplementary file 1 [file kjim-2019-016-suppl7.pdf]

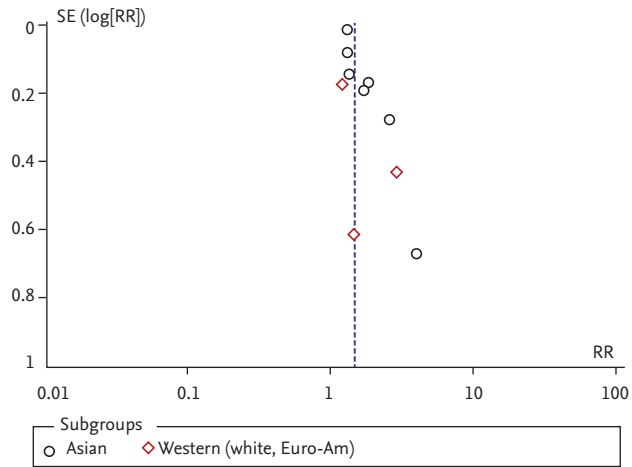

**Supplementary Figure 3.** Funnel plot for the studies regarding moderate dose alcohol at baseline in men. SE, standard error; RR, relative risk.
